# Supplementary material for: Cuprous sulfide counter electrodes prepared by ion exchange for high-efficiency quantum dot-sensitized solar cells
Source: Royal Society of Chemistry journal article supplement (doi:10.1039/c3ta14520d), 2013-12-13
Supplement: c3ta14520d.pdf [file c3ta14520d.pdf]

# Cuprous Sulfide Counter Electrodes Prepared by Ion Exchange for High-Efficiency Quantum Dot-sensitized Solar Cells

Chao Shen,<sup>a</sup> Lidong Sun,<sup>a</sup> Zhen Yu Koh,<sup>a</sup> and Qing Wang\*<sup>a</sup>

<sup>a</sup>Department of Materials Science and Engineering, Faculty of Engineering, NUSNNI-NanoCore, National University of Singapore, Singapore 117576, Fax: +65 67763604, Tel: +65 65167118; E-mail: qing.wang@nus.edu.sg

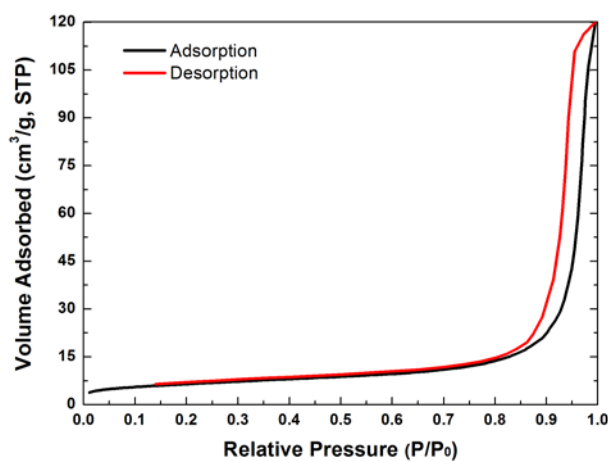

Figure S1. N<sub>2</sub> sorption isotherms of the ITO powder

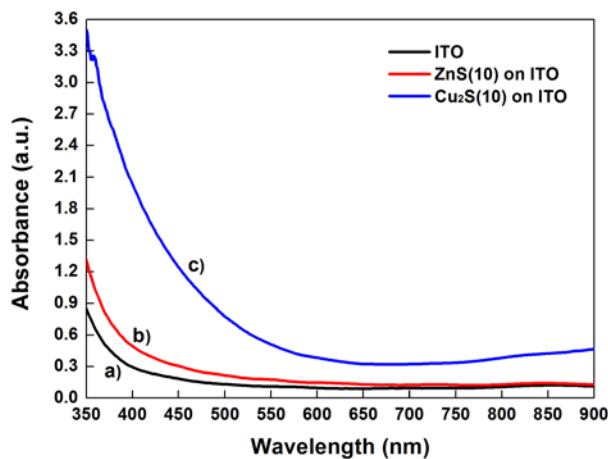

Figure S2. Absorbance spectra of a bare ITO electrode (a) after depositing 10 cycles of ZnS (b) and subsequently subjected to ion exchanging for 10 min to form cuprous sulfide (c).

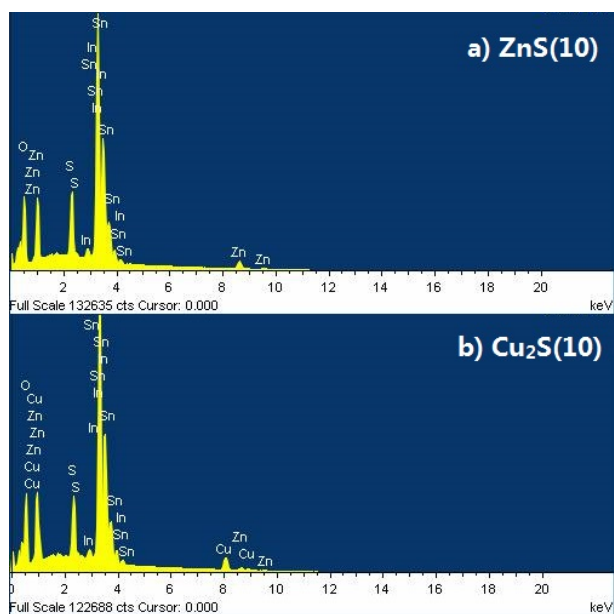

**Figure S3.** EDX spectra of a bare ITO electrode after depositing 10 cycles of ZnS (a) and subsequently subjected to ion exchanging for 10 min to form cuprous sulfide (b).

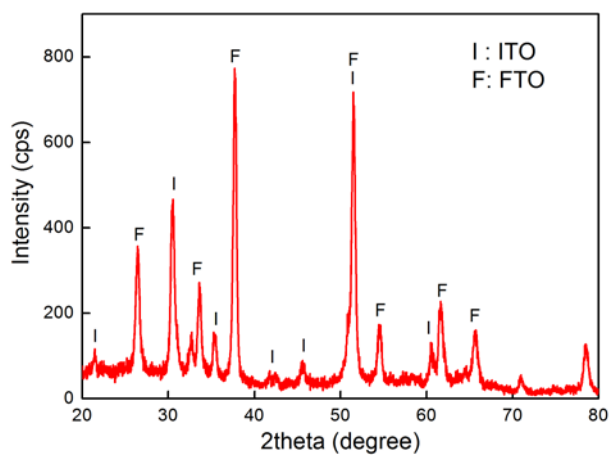

**Figure S4.** Glancing angle XRD patterns of Cu<sub>2</sub>S(10) on ITO electrodes.
